# Supplementary material
Source: PubMed Central journal article supplement (PMC5584698)
Supplement: JCB686092_supplementary_material.pdf [file JCB686092_supplementary_material.pdf]

## Supplementary Material for

# Cerebellar heterogeneity and its impact on PET data quantification of 5-HT receptor radioligands

Melanie Ganz<sup>1</sup>, Ling Feng<sup>1</sup>, Hanne Demant Hansen<sup>1</sup>, Vincent Beliveau<sup>1,2</sup>, Claus Svarer<sup>1</sup>, Gitte M. Knudsen<sup>1,2</sup>, Douglas N. Greve<sup>3,4</sup>

<sup>1</sup>Neurobiology Research Unit and Center for Integrated Molecular Brain Imaging, Rigshospitalet, Copenhagen, Denmark

<sup>2</sup>Faculty of Health and Medical Sciences, University of Copenhagen, Copenhagen, Denmark

<sup>3</sup>Athinoula A. Martinos Center for Biomedical Imaging, Department of Radiology, Massachusetts General Hospital, Boston, MA, USA

<sup>4</sup>Harvard Medical School, Boston, MA, USA

Corresponding author:

Gitte Moos Knudsen, Neurobiology Research Unit, 28 Juliane Maries Vej, Rigshospitalet, building 6931, 2100 Copenhagen, Denmark.

## 1 Demographic information

| Radioligand                              | [ <sup>11</sup> C]DASB | [ <sup>11</sup> C]CUMI-101 | [ <sup>11</sup> C]AZ10419369 | [ <sup>11</sup> C]Cimbi-36 | [ <sup>11</sup> C]SB207145 |
|------------------------------------------|------------------------|----------------------------|------------------------------|----------------------------|----------------------------|
| <b>N</b>                                 | 100                    | 8                          | 36                           | 29                         | 59                         |
| <b>Gender (M/F)</b>                      | 29/71                  | 3/5                        | 24/12                        | 15/14                      | 41/18                      |
| <b>Age (mean±std)</b>                    | 25.1±5.8               | 28.4±8.8                   | 27.8±6.9                     | 22.6±2.7                   | 25.9±5.3                   |
| <b>Age (min-max)</b>                     | 18.4-44.9              | 20.1-43.9                  | 18.8-44.8                    | 18.4-28.7                  | 20.1-44.8                  |
| <b>BMI (kg/m<sup>2</sup>) (mean±std)</b> | 23.2±2.9               | 22.7±2.6                   | 24.9±4.3                     | 23.4±2.4                   | 23.5±3.3                   |
| <b>Injected Dose (MBq) (mean±std)</b>    | 586.0±32.2             | 510.5±149.1                | 585.4±37.4                   | 510.4±109.7                | 577.1±70.9                 |
| <b>Injected Mass (µg) (mean±std)</b>     | 1.9±2.2                | 2.0±1.5                    | 1.2±1.0                      | 0.8±0.5                    | 1.1±0.7                    |

Table 1. Demographic details of the included healthy subjects.

## 2 PET scanning parameters

| Radioligand                          | [ <sup>11</sup> C]DASB                      | [ <sup>11</sup> C]CUMI-101            | [ <sup>11</sup> C]AZ10419369    | [ <sup>11</sup> C]Cimbi-36      | [ <sup>11</sup> C]SB207145            |
|--------------------------------------|---------------------------------------------|---------------------------------------|---------------------------------|---------------------------------|---------------------------------------|
| <b>Scan time (min)</b>               | 90                                          | 120                                   | 90                              | 120                             | 120                                   |
| <b>Frame lengths (number x sec)</b>  | 6x10, 3x20, 6x30, 5x60, 5x120, 8x300, 3x600 | 6x5, 10x15, 4x30, 5x120, 5x300, 8x600 | 6x10, 6x20, 6x60, 8x120, 19x300 | 6x10, 6x20, 6x60, 8x120, 19x300 | 6x5, 10x15, 4x30, 5x120, 5x300, 8x600 |
| <b>Realigned frames (first:last)</b> | 10:36                                       | 10:38                                 | 13:45                           | 13:45                           | 10:38                                 |
| <b>Reference frame</b>               | 26                                          | 26                                    | 27                              | 27                              | 26                                    |

Table 2. Details of the PET scanning parameters as well as the realignment procedure.

### 3 MR scanning parameters

The acquisition parameters for the four MR scanners were the following:

- Siemens Verio: sagittal, magnetization prepared rapid gradient echo (MPRAGE) scan of the head: echo time (TE)/repetition time (TR)/ inversion time (TI) = 2.32/1900/900 ms; slice resolution=100%; bandwidth=200 (Hz/Px); echo spacing=7.1 ms; flip angle= 9°; field of view (FOV)=230 mm; matrix 256x256 (base resolution); (slices/slab: 224); GRAPPA acceleration factor 2; 0.9x0.9x0.9mm voxels; 224 slices, acquisition time = 8.50 minutes.
- Siemens Trio: sagittal, magnetization prepared rapid gradient echo (MPRAGE) scan of the head: echo time (TE)/repetition time (TR)/ inversion time (TI) = 3.04/1550/800 ms; slice resolution=100%; bandwidth=170 (Hz/Px); echo spacing=7.7 ms; flip angle=9°; field of view (FOV)=256 mm; matrix 256x256; 1x1x1mm voxels; 192 slices, acquisition time = 6.32 minutes.
- Siemens Prisma: sagittal, magnetization prepared rapid gradient echo (MPRAGE) scan of the head: echo time (TE)/repetition time (TR)/ inversion time (TI) = 2.58/1900/900 ms; slice resolution= 100 %; bandwidth= 170 (Hz/Px); echo spacing= 7.8 ms; flip angle= 9°; field of view (FOV)=230 mm; matrix 256x256 (base resolution); (slices/slab: 224); GRAPPA acceleration factor 2; 0.9x0.9x0.9mm voxels; 224 slices, acquisition time = 4.26 minutes.

### 4 Overview of differences in cerebellar uptake and neocortical binding potential

| Difference in MeanSUV        | CH vs. CV | CH vs. CW | CH vs. Total Cb | CV vs. CW | CV vs. Total Cb | CW vs. Total Cb |
|------------------------------|-----------|-----------|-----------------|-----------|-----------------|-----------------|
| [ <sup>11</sup> C]CUMI       | 0.0094    | 0.0094    | 0.0094          | 0.0094    | 0.0094          | 0.0094          |
| [ <sup>11</sup> C]AZ10419369 | 0.0017    | 0.0014    | 0.0011          | 0.1357    | 0.0058          | 0.0014          |
| [ <sup>11</sup> C]Cimbi-36   | 0.0001    | 0.0000    | 0.0000          | 0.0000    | 0.0000          | 0.0000          |
| [ <sup>11</sup> C]SB207145   | 0.2366    | 0.0000    | 0.0000          | 0.0000    | 0.0000          | 0.0000          |
| [ <sup>11</sup> C]DASB       | 0.0000    | 0.0000    | 0.0000          | 0.0781    | 0.0000          | 0.0000          |

(a)

| Difference in neocortical BP <sub>ND</sub> | CH vs. CV | CH vs. CW | CH vs. Total Cb | CV vs. CW | CV vs. Total Cb | CW vs. Total Cb |
|--------------------------------------------|-----------|-----------|-----------------|-----------|-----------------|-----------------|
| [ <sup>11</sup> C]CUMI                     | 0.0094    | 0.0094    | 0.0094          | 0.0094    | 0.0094          | 0.0094          |
| [ <sup>11</sup> C]AZ10419369               | 0.0000    | 0.3792    | 0.1219          | 0.0011    | 0.0000          | 0.4761          |
| [ <sup>11</sup> C]Cimbi-36                 | 0.4904    | 0.0000    | 0.0000          | 0.0000    | 0.4265          | 0.0000          |
| [ <sup>11</sup> C]SB207145                 | 0.2542    | 0.0000    | 0.0000          | 0.0000    | 0.5611          | 0.0000          |
| [ <sup>11</sup> C]DASB                     | 0.0000    | d.n.a.    | 0.0000          | d.n.a.    | 0.0000          | d.n.a.          |

(b)

Table 3. Overview of differences in cerebellar uptake and neocortical binding potential based on different reference region definitions. (a) Outcome of within subjects, paired nonparametric two-sided Wilcoxon signed rank tests between mean SUV in all regions. (b) Outcome of within subjects, paired nonparametric two-sided Wilcoxon signed rank tests between neocortical BP<sub>ND</sub> based on the different regions. All p-values were globally (over mean SUV and BP<sub>ND</sub>) corrected for FDR<0.05<sup>1</sup>.

## 5 Neocortical binding potential using CH, CV, and CW as reference region

| Tracer                       | Mean BP <sub>nd</sub> CH | Std BP <sub>nd</sub> CH | Mean BP <sub>nd</sub> CV | Std BP <sub>nd</sub> CV | Mean BP <sub>nd</sub> CW | Std BP <sub>nd</sub> CW | Mean BP <sub>nd</sub> Total Cb | Std BP <sub>nd</sub> Total Cb |
|------------------------------|--------------------------|-------------------------|--------------------------|-------------------------|--------------------------|-------------------------|--------------------------------|-------------------------------|
| [ <sup>11</sup> C]CUMI-101   | 1.58                     | 0.27                    | 1.38                     | 0.29                    | 2.33                     | 0.37                    | 1.69                           | 0.28                          |
| [ <sup>11</sup> C]AZ10419369 | 1.56                     | 0.25                    | 1.69                     | 0.31                    | 1.6                      | 0.26                    | 1.57                           | 0.24                          |
| [ <sup>11</sup> C]Cimbi-36   | 1.51                     | 0.18                    | 1.49                     | 0.19                    | 1.33                     | 0.14                    | 1.47                           | 0.17                          |
| [ <sup>11</sup> C]SB207145   | 0.79                     | 0.08                    | 0.8                      | 0.1                     | 0.85                     | 0.1                     | 0.8                            | 0.08                          |
| [ <sup>11</sup> C]DASB       | 0.48                     | 0.08                    | 0.33                     | 0.08                    | d.n.f.                   | d.n.f.                  | 0.42                           | 0.07                          |

Table 4. Mean and standard deviation of neocortical binding potential values using CH, CV CW and total Cb as reference region, respectively (d.n.f.: does not fit).

## 6 Blocking experiments

### A. [<sup>11</sup>C]CUMI-101 blocking experiments

One of the [<sup>11</sup>C]CUMI-101 subjects underwent a pindolol blocking scan. Orally pindolol administration started three days before scanning: 3 times per day (2.5mgx3 on day one, 5mgx3 2nd day, and 7.5mgx3 3rd day), 7.5mg in the morning of scanning, and 7.5mg one hour before scanning. The distribution volumes ( $V_T$ ) of both the baseline scan and the blocking scan were quantified using a 2 tissue compartment model with 4 parameters. Based on an occupancy plot of 23 ROIs and cerebellum before and after pindolol injection we calculate the occupancy to be around 48% and  $V_{ND}=3.7$ . In order to derive this we used the relationship between baseline and blocking  $V_T$  of the form:  $V_{T,block} = (1 - O) \cdot V_{T,base} + O \cdot V_{T,base}$

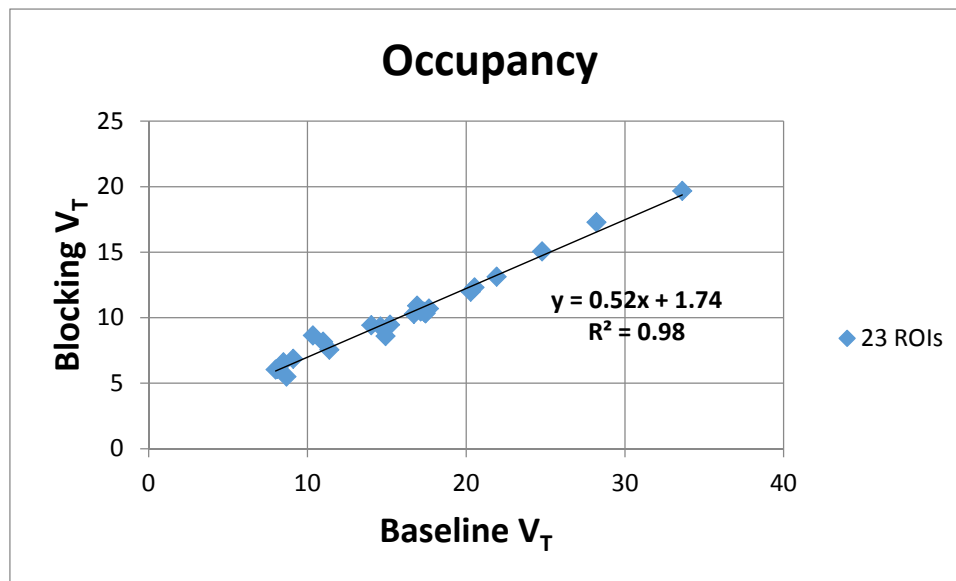

**Figure 1.** Occupancy plot of the effect of pindolol on [<sup>11</sup>C]CUMI-101 binding.

Calculating the difference between the baseline  $V_T$  and the derived  $V_{ND}$  yields the smallest difference for CW and total cerebellum (which is largely driven by CW) and thereafter CH, CH+CV and finally CV.

| Distribution volume (mL cm <sup>-3</sup> ) | CH   | CV   | CH+CV | CW   | Total cb |
|--------------------------------------------|------|------|-------|------|----------|
| Baseline V <sub>T</sub>                    | 7.68 | 8.87 | 7.85  | 5.86 | 7.41     |
| Baseline V <sub>T</sub> - V <sub>ND</sub>  | 4.01 | 5.21 | 4.18  | 2.20 | 3.74     |

**Table 5.** Baseline V<sub>T</sub> and difference to V<sub>ND</sub> estimated for the single [<sup>11</sup>C]CUMI blocking subject.

From the shape of the baseline and blocking SUVs displayed in Figure 2 we can deduce two things: 1) The kinetics of all reference regions, CW, CH, CV and CH+CV is similar. 2) Furthermore, blocking should bring receptor-rich region closer to receptor-free regions and we see an effect of this exhibit itself in the case of CV.

## [<sup>11</sup>C]CUMI-101 Baseline and blocking data

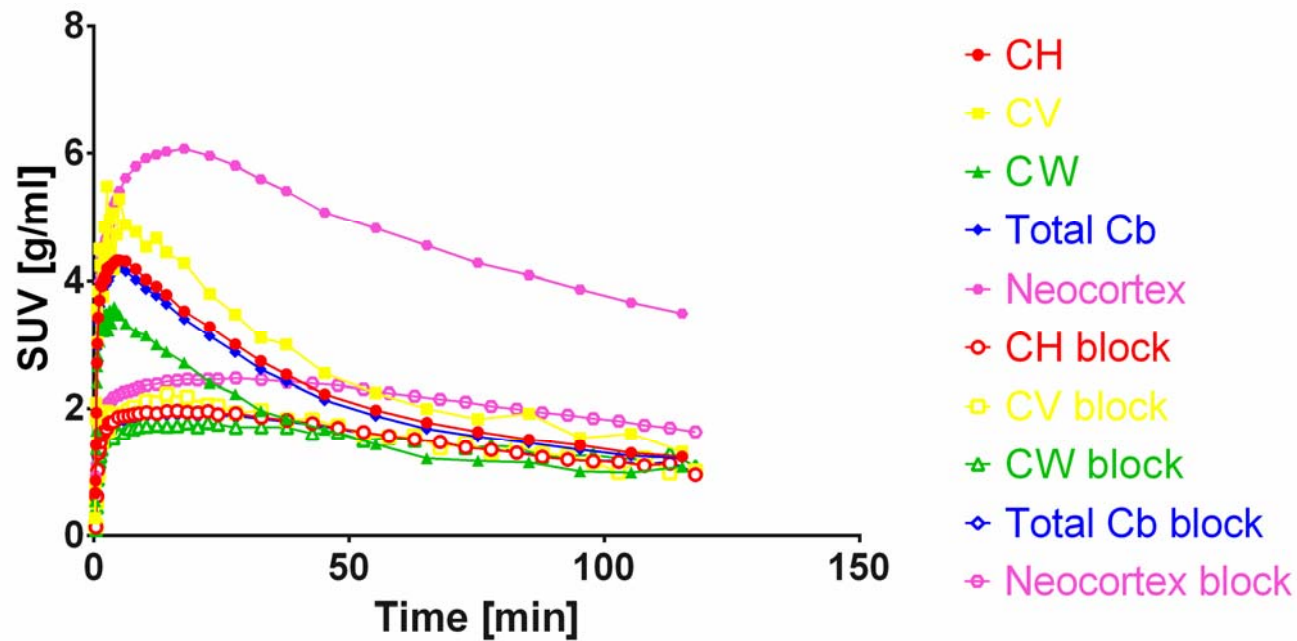

**Figure 2.** Baseline and blocking SUVs for the [<sup>11</sup>C]CUMI-101 blocking subject.

## B. [<sup>11</sup>C]Cimbi-36 blocking experiments

Based on four Cimbi-36 subjects (we needed to exclude Subject 5 since not all of cerebellum was covered in the PET scan), we can derive the  $V_T$  for five different reference regions, CH, CV, CH+CV as well as additionally requested in a comment below cerebellar white matter (CW) and total cerebellum using arterial input and a 2 tissue compartment model<sup>2</sup>. We can compare the  $V_T$  of the five reference regions to the true non-displaceable binding derived in the associated blocking studies and presented in Table 2 of Ettrup et al.<sup>2</sup>. Calculating the sum of squared differences (SSD) between the  $V_{ND}$  and the  $V_T$  of the different reference regions, we find that CH is the reference region that most closely relates to  $V_{ND}$  derived from blocking experiments, followed by using CH+CV, the whole cerebellum, CW and finally CV. The reason that CH+CV ranks high is that CV has a small influence on the arterial modeling of the whole region CH+CV. Also CW is besides CV performing the worst.

| Baseline $V_T$ | CH    | CV    | CH+CV | CW    | Total cb |
|----------------|-------|-------|-------|-------|----------|
| Subject 1      | 10.19 | 10.20 | 10.02 | 10.08 | 9.96     |
| Subject 2      | 11.36 | 9.10  | 11.20 | 11.36 | 11.40    |
| Subject 3      | 10.37 | 10.43 | 10.38 | 10.70 | 10.43    |
| Subject 4      | 13.51 | 14.32 | 13.56 | 14.23 | 13.68    |

(a)

| $V_{ND}$ - Baseline $V_T$ | CH    | CV    | CH+CV | CW    | Total cb |
|---------------------------|-------|-------|-------|-------|----------|
| Subject 1                 | 2.41  | 2.40  | 2.58  | 2.52  | 2.64     |
| Subject 2                 | 1.34  | 3.60  | 1.50  | 1.34  | 1.30     |
| Subject 3                 | 1.33  | 1.27  | 1.32  | 1.00  | 1.27     |
| Subject 4                 | -1.61 | -2.42 | -1.66 | -2.33 | -1.78    |
| SSD                       | 11.97 | 26.14 | 13.40 | 14.59 | 13.45    |

(b)

Table 6. (a) Baseline  $V_T$  and (b) difference to  $V_{ND}$  estimated from blocking for four subjects from Ettrup et al.<sup>2</sup>

## 7 Mean SUV curves

In the following we show standardized uptake value (SUV) curves for all ligands for all regions of interest in cerebellum (CH, CV, CH+CV, CW, total cerebellum) as well as neocortex as mean+SD curves. The curves already show the differences we observe between the different regions.

For [11C]CUMI-101 the neocortex SUV is as expected the highest followed by the vermis SUV. Next, the SUVs of total cerebellum, CH+CV and CH lie very close to each other and finally the SUV of CW is lowest. The kinetics are very similar for all reference regions. Regarding the SUVs for [11C]AZ10419369 there is almost no difference between the SUVs of CV, CH, CH+CV and total cerebellum, while CW again has slightly slower kinetics. While the ordering of the SUVs is again similar for the case of [11C]Cimbi-36, the average SUVs here highlight the different and slower kinetics of CW compared with CV, CH, CH+CV and the total cerebellum. In the case of [11C]SB207145 we observe the same difference in kinetics between CV, CH, CH+CV and CW albeit the difference is smaller than in the case of [11C]Cimbi-36. Finally, the average SUVs for [11C]DASB have again the same ranking, but additionally show a time shift in the white matter kinetics.



# Mean SUV curves for [ $^{11}\text{C}$ ]CUMI-101 (n=8)

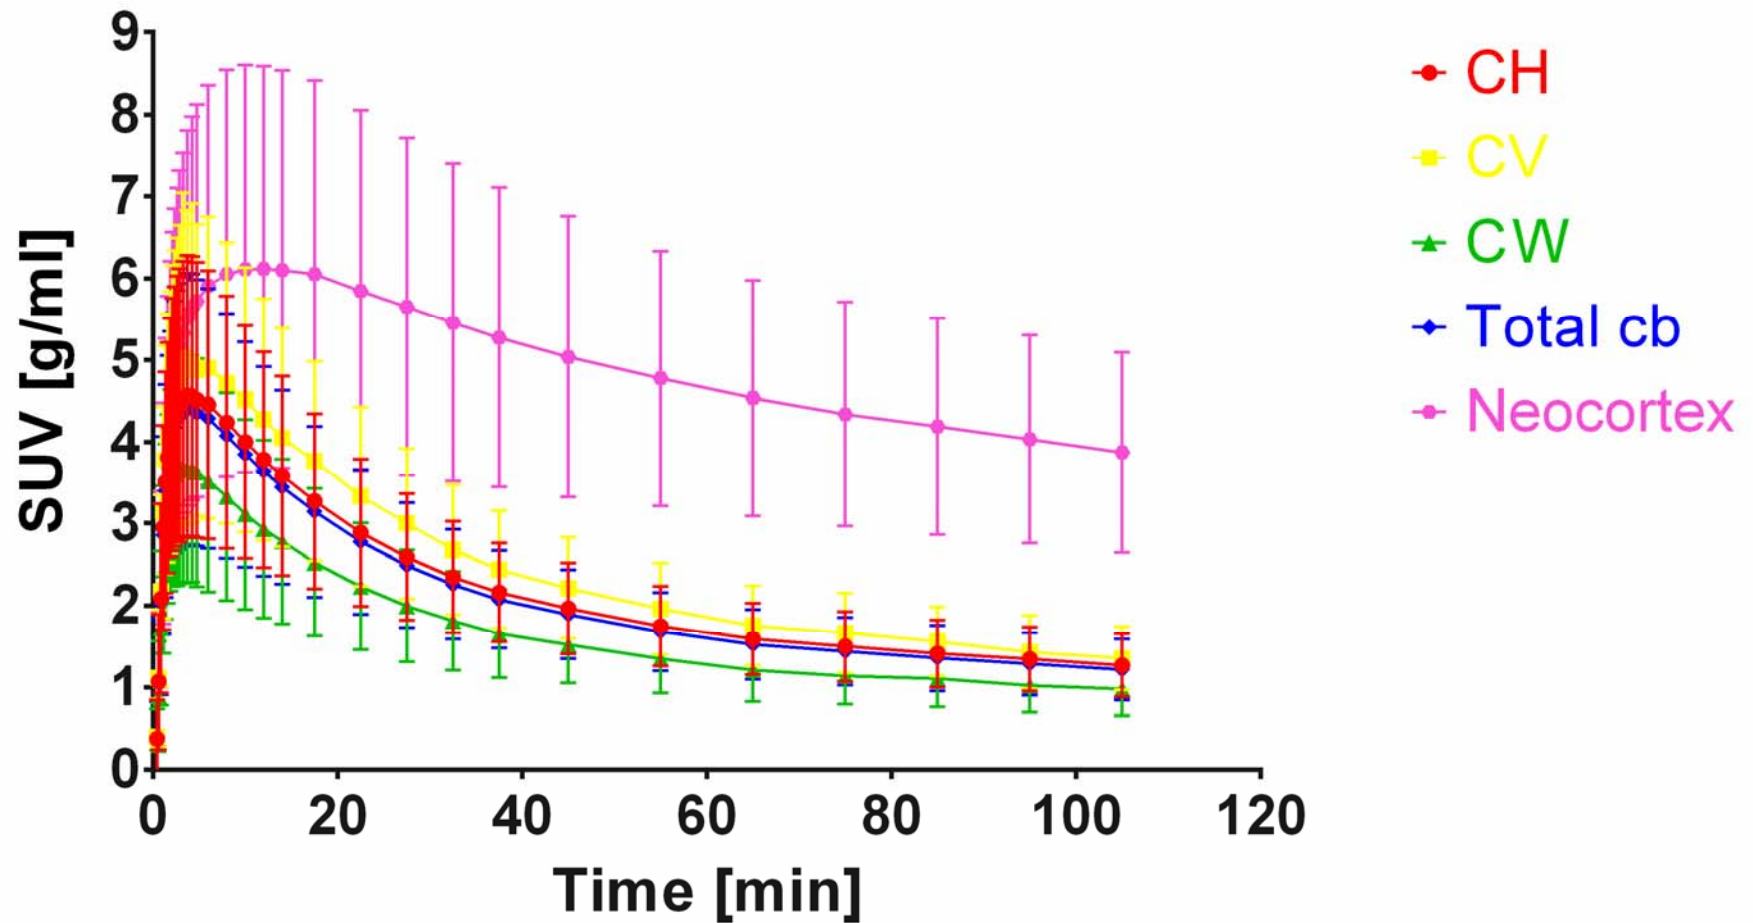

(a)

# Mean SUV curves for [ $^{11}\text{C}$ ]AZ10419369 (n=36)

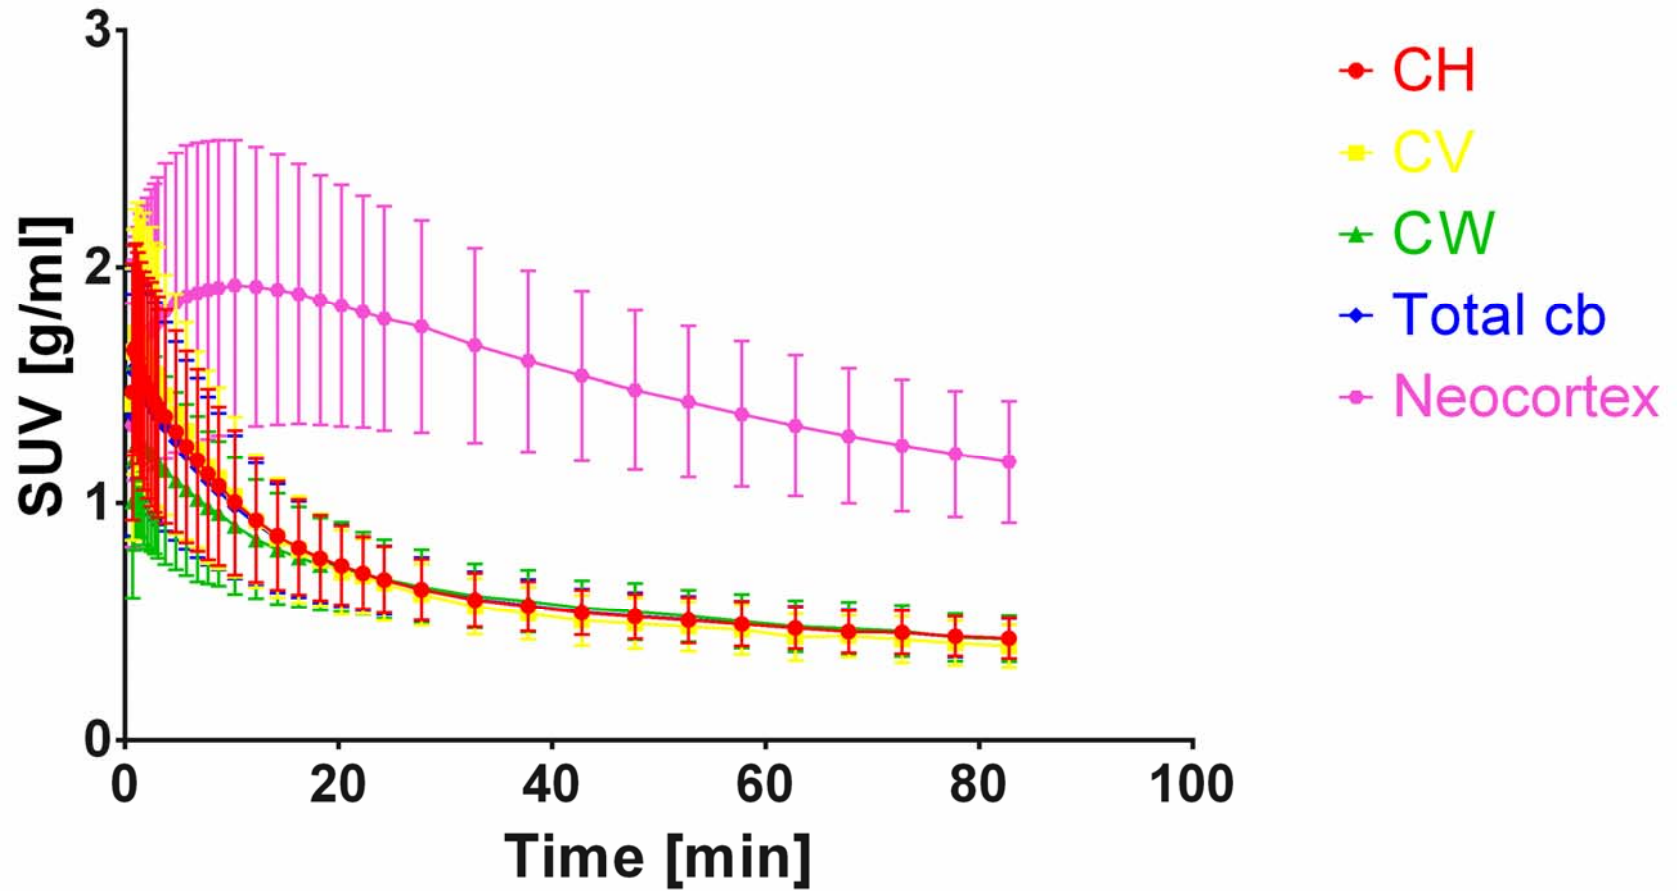

(b)

# Mean SUV curves for [ $^{11}\text{C}$ ]Cimbi-36 (n=29)

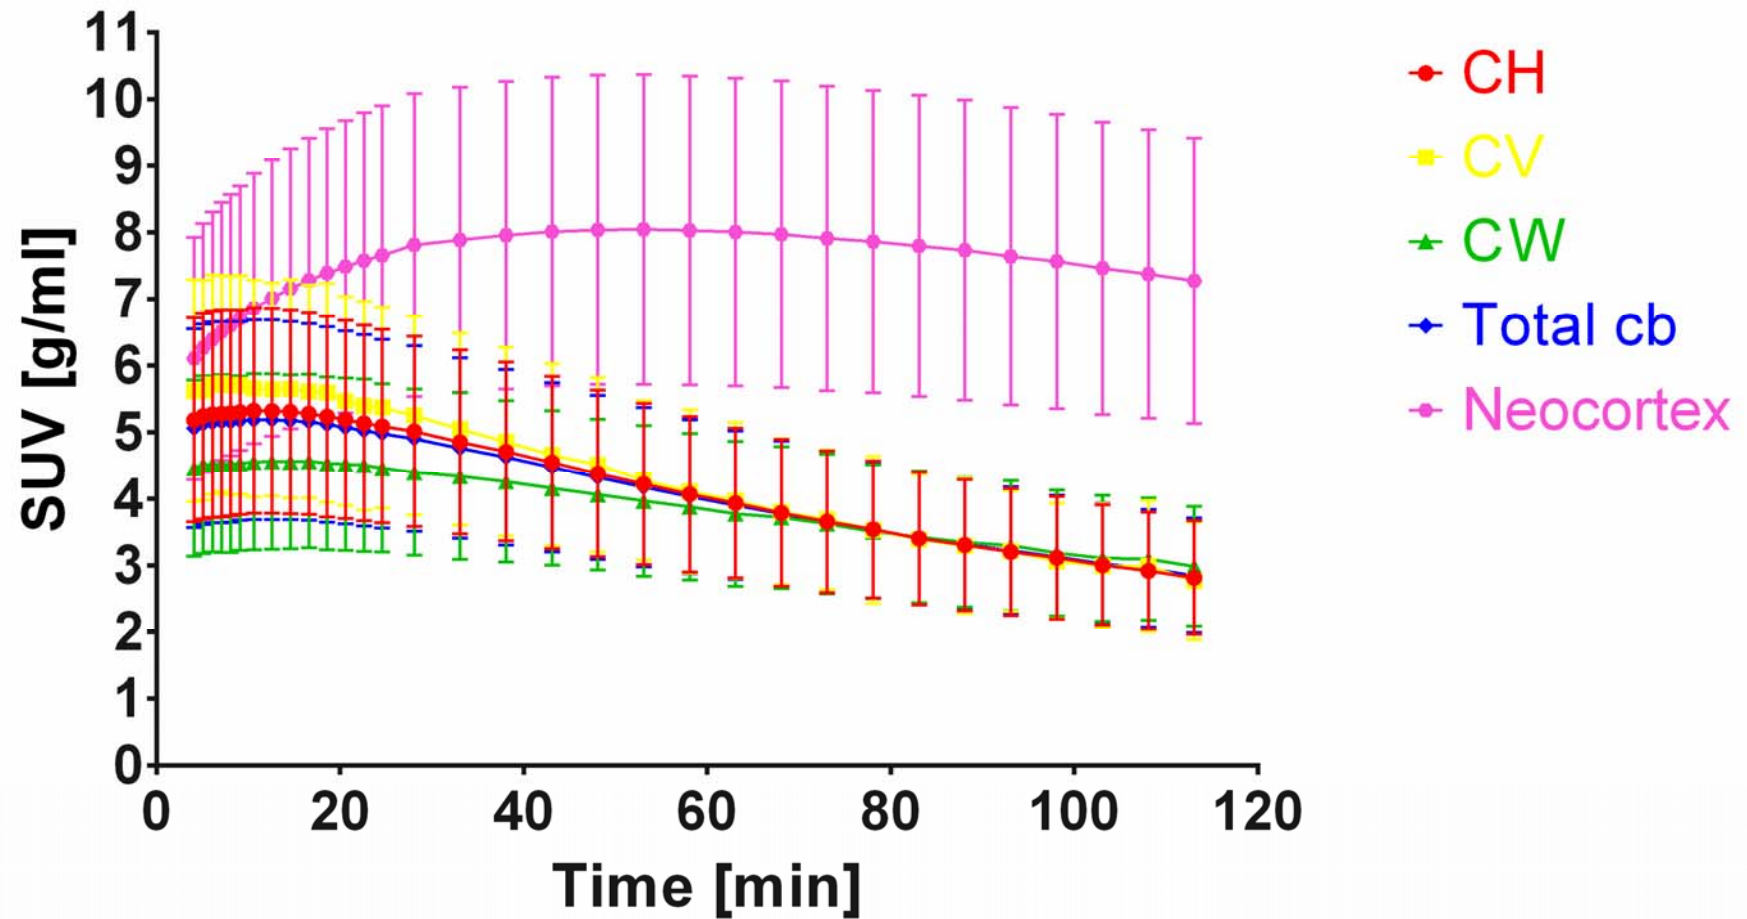

(c)

# Mean SUV curves for [ $^{11}\text{C}$ ]SB207145 (n=59)

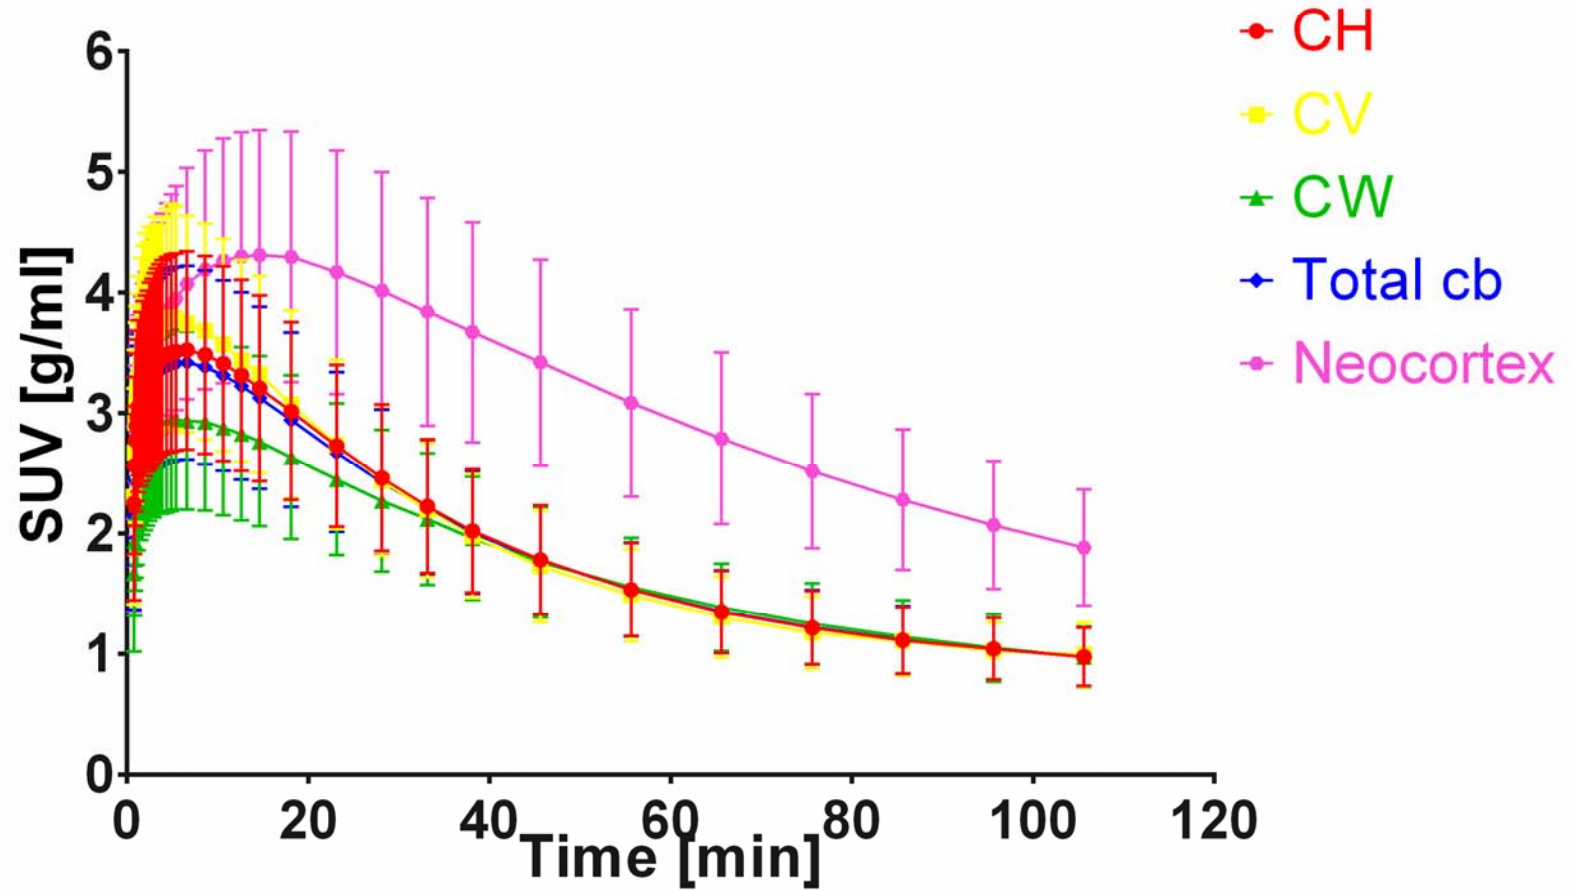

(d)

## Mean SUV curves for [ $^{11}\text{C}$ ]DASB (n=100)

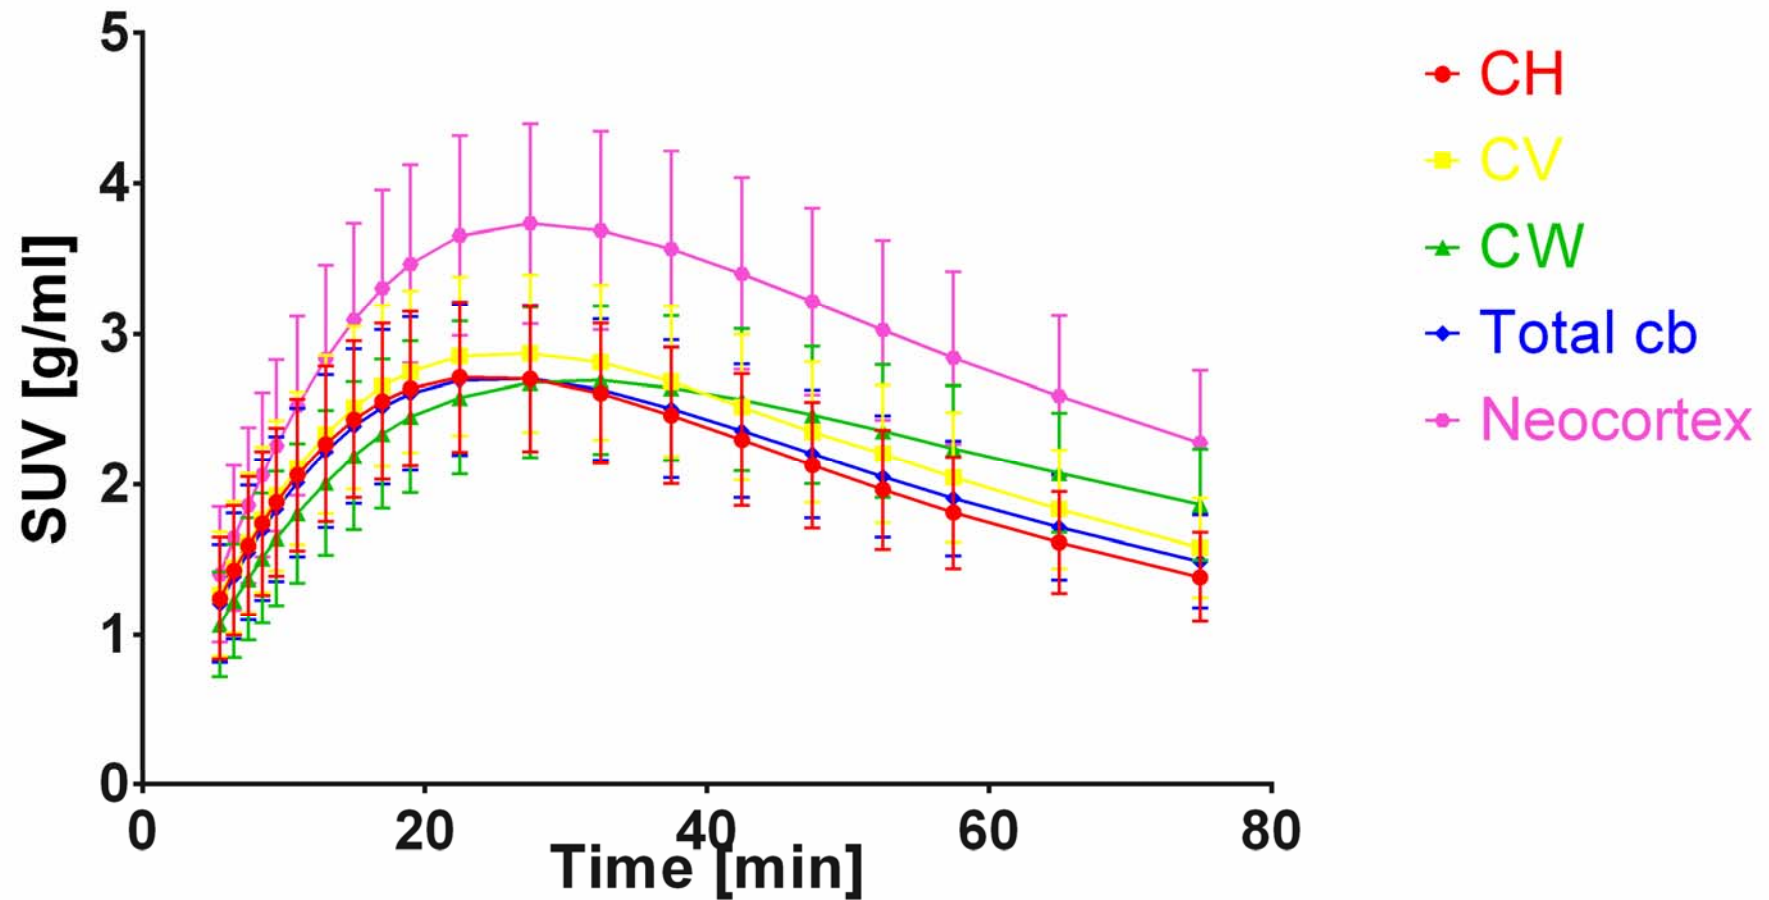

(e)

Figure 3. Population mean  $\pm$  standard deviation SUV curves for (a) [ $^{11}\text{C}$ ]CUMI-101 (n=8), (b) [ $^{11}\text{C}$ ]AZ10419369 (n=36), (c) [ $^{11}\text{C}$ ]Cimbi-36 (n=29), (d) [ $^{11}\text{C}$ ]SB207145 (n=59) and (e) [ $^{11}\text{C}$ ]DASB (n=100).

## References

1. Benjamini Y, Hochberg Y. Benjamini Y, Hochberg Y. Controlling the false discovery rate: a practical and powerful approach to multiple testing. *J R Stat Soc B* 1995; 57: 289–300.
2. Ettrup A, da Cunha-Bang S, McMahon B, et al. Serotonin 2A receptor agonist binding in the human brain with [<sup>11</sup>C]Cimbi-36. *J Cereb Blood Flow Metab* 2014; 34: 1188–96.
